# Supplementary material for: Metabolic Engineering of Isoflavonoid Biosynthesis by Expressing Glycine max Isoflavone Synthase in Allium cepa L. for Genistein Production
Source: MDPI journal article supplement (doi:10.3390/plants10010052), 2020-12-29
Supplement: s1 [file s1]

### Supplementary Material

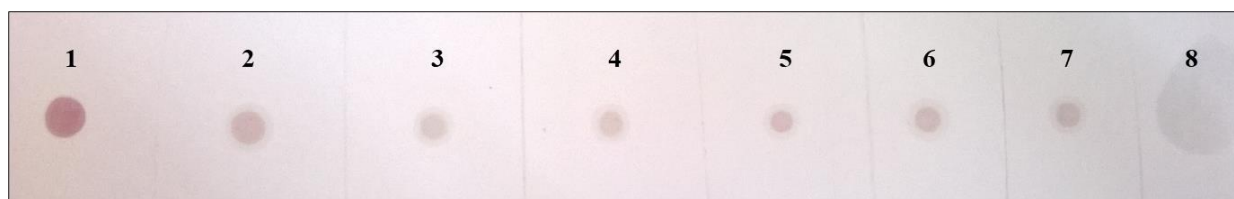

**Supplementary Figure S1:** Dot blot analysis of putative transformants. Lane 1, 2: Positive control (Plasmid), Lane 3-5: *Agrobacterium* transformed callus, Lane 6-7: Gene gun transformed callus, Lane 8: (Wild type callus) Negative control.
